# Supplementary material for: Bordetella filamentous hemagglutinin and adenylate cyclase toxin interactions on the bacterial surface are consistent with FhaB-mediated delivery of ACT to phagocytic cells
Source: PubMed Central journal article supplement (PMC11077949; doi:10.1128/mbio.00632-24), 2024-03-27
Supplement: mbio.00632-24-s0001.pdf [file mbio.00632-24-s0001.pdf]

## Supporting Information

**Table S1. Bacterial strains and plasmids used in this study**

| <b>Bacterial strains</b> | <b>Description</b>                                                                                                           | <b>Supp. Reference</b> |
|--------------------------|------------------------------------------------------------------------------------------------------------------------------|------------------------|
| RB50                     | <i>Bordetella bronchiseptica</i> Complex I strain, isolated from naturally infected rabbit respiratory tract                 | (1)                    |
| RBX11                    | RB50 containing a deletion of <i>fhaS</i> codons 4-3203                                                                      | (2)                    |
| RBX11 HA-PRR             | RBX11 containing an insertion of nine codons that encode the HA epitope (YPYDVPDYA) following <i>fhaB</i> codon 3375.        | (3)                    |
| RBX11 $\Delta sphB1$     | RBX11 containing a deletion of codons 5-1035 of <i>sphB1</i>                                                                 | (4)                    |
| RBX9F                    | RBX9 with a deletion mutation of the <i>fimA-fhaB</i> intergenic region                                                      | (5)                    |
| RBX24                    | RBX9 containing a deletion of <i>sphB1</i> codons 5-1035                                                                     | this work              |
| RB515                    | RB50 containing a deletion of <i>cyaA</i> codons 5-1701                                                                      | (6)                    |
| RB516                    | RBX9 containing a deletion of <i>cyaA</i> codons 5-1701                                                                      | (6)                    |
| RB518                    | RB50 with deletions of codons 5-1035 of <i>sphB1</i> and <i>cyaA</i> codons 5-1701                                           | this work              |
| RB512                    | RB50 producing ACT with an HA epitope (YPYDVPDYA) after the start codon                                                      | this work              |
| RB512 $\Omega sphB1$     | RB512 with plasmid disruption within <i>sphB1</i>                                                                            | this work              |
| RB513                    | RB50 producing ACT with an HA epitope (YPYDVPDYA) immediately before the stop codon                                          | this work              |
| RB513 $\Omega sphB1$     | RB513 with plasmid disruption within <i>sphB1</i>                                                                            | this work              |
| RB519                    | RB50 producing ACT with SQMLTR (aa322-327) mutated to GVIDVE encompassing the SphB1 cleavage site on ACT                     | this work              |
| RB519 $\Omega sphB1$     | RB519 with plasmid disruption within <i>sphB1</i>                                                                            | this work              |
| RB522                    | RB50 producing ACT with M324D and L325P                                                                                      | this work              |
| RB523                    | RB50 producing ACT with M324Y and L325F                                                                                      | this work              |
| SphB1 <sup>NT-HA</sup>   | RB50 producing SphB1 with an HA epitope (YPYDVPDYA) after Pro 58                                                             | this work              |
| DH5 $\alpha$             | <i>E. coli</i> cloning strain                                                                                                | Thermo Fisher          |
| RHO3                     | <i>E. coli</i> conjugation strain and DAP auxotroph                                                                          | (7)                    |
| SM10 $\lambda$ pir       | <i>E. coli</i> conjugation strain                                                                                            | (8)                    |
| <b>Plasmid</b>           | <b>Description</b>                                                                                                           | <b>Reference</b>       |
| pSS4245                  | Allelic exchange plasmid for <i>B. bronchiseptica</i> . Used to create in-frame deletions.                                   | (9)                    |
| pCI51                    | pSS4245 derivative used to insert HA coding sequence in <i>cyaA</i> after ATG start con                                      | this work              |
| pCI52                    | pSS4245 derivative used to insert HA coding sequence in <i>cyaA</i> before stop codon                                        | this work              |
| pCI53                    | pSS4245 derivative used to delete codons 5-1701 in $\Delta cyaA$                                                             | (6)                    |
| pCI55                    | pSS4245 derivative used to change <i>cyaA</i> to encode SQMLTR (aa322-327) to GVIDVE encompassing SphB1 cleavage site on ACT | this work              |
| pCI58                    | pSS4245 derivative used to change <i>cyaA</i> to encode M324D and L325P                                                      | this work              |
| pCI59                    | pSS4245 derivative used to change <i>cyaA</i> to encode M324Y and L325F                                                      | this work              |
| pEG7 $\Omega sphB1$      | pEG7 derivative used to disrupt the <i>sphB1</i> locus                                                                       | this work              |

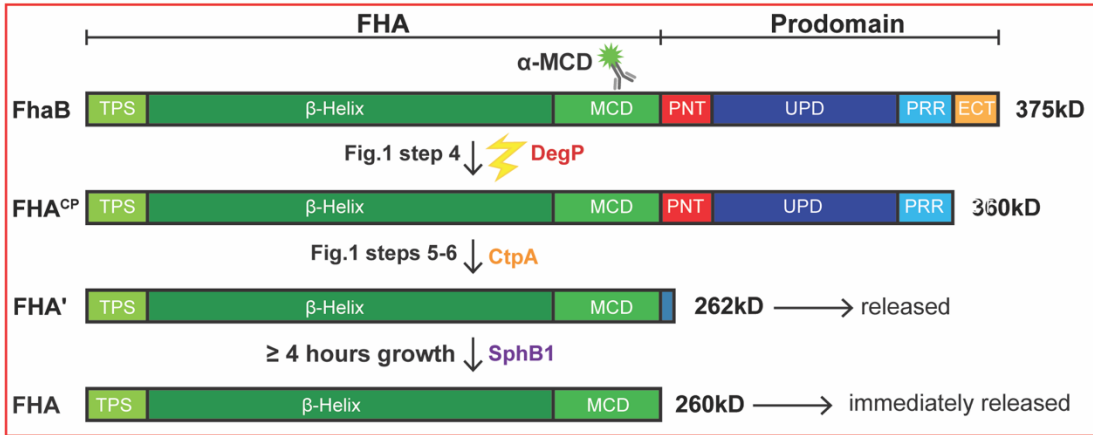

**Figure S1. Linear diagram of FhaB processing by multiple proteases.**

A signal (lightning bolt), hypothesized to be engagement of the FhaB-ACT complex with receptors on host cells, causes DegP to remove the Extreme C-terminus (ECT) that protects the FhaB prodomain from CtpA (Fig. 1 step 4). This clipped product (FhaB<sup>CP</sup>) is recognized by CtpA, which degrades the majority of the prodomain to form FhaB'. CtpA degradation of the PNT allows a portion of FhaB' near its C terminus to emerge on the surface (Fig. 1, steps 5-6), which is cleaved by the exoprotease SphB1 to produce FhaB (not shown in Fig. 1). FhaB is then rapidly released from the bacterial surface.

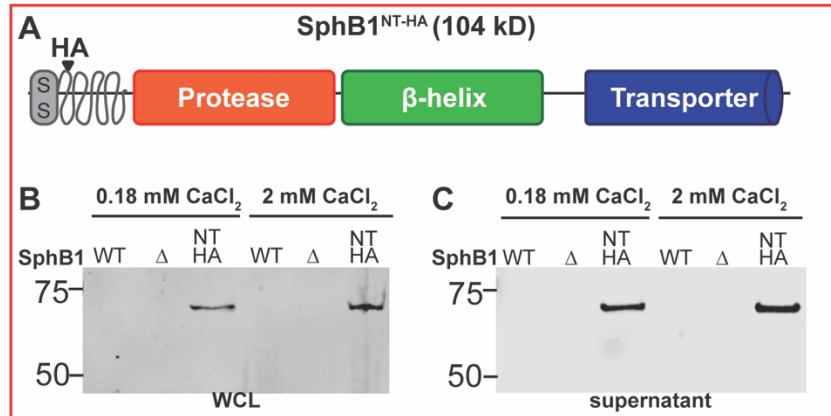

**Figure S2. *Bordetella* grown in both standard and high calcium produce and secrete similar amounts of SphB1.**

**A.** Diagram of SphB1<sup>NT-HA</sup> indicating the domains within SphB1 and the location of the HA insertion following the signal sequence (SS) after proline 58. **B.** WCL and supernatants collected from the SphB1<sup>NT-HA</sup> strain grown in standard SS (0.18 mM CaCl<sub>2</sub>) or SS supplemented with high calcium (2 mM CaCl<sub>2</sub>) contain similar amounts of SphB1<sup>NT-HA</sup> polypeptides.

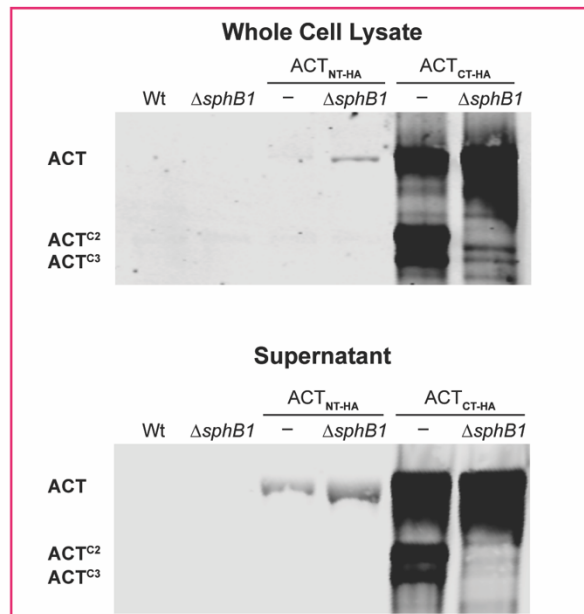

**Figure S3. N-terminal HA tag on ACT is readily removed.**

Western blots from Figure 6 but showing only HA signal, which has been brightened to show signal in ACT<sup>NT-HA</sup> samples.

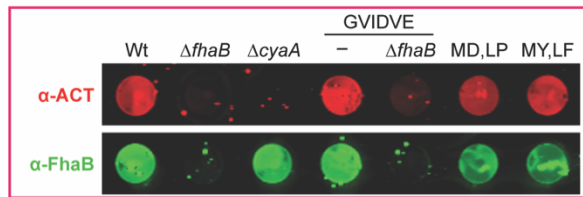

**Figure S4. Less cleaved ACT variants still bind FhaB on the bacterial surface.**

Surface-exposed ACT and FhaB were labelled on intact wild-type,  $\Delta fhaB$ ,  $\Delta cyoA$  bacteria, and also on strains with amino acid substitutions in ACT near the predicted SphB1-dependent cleavage site using polyclonal antibodies generated against the MCD region of FhaB, or all of ACT.

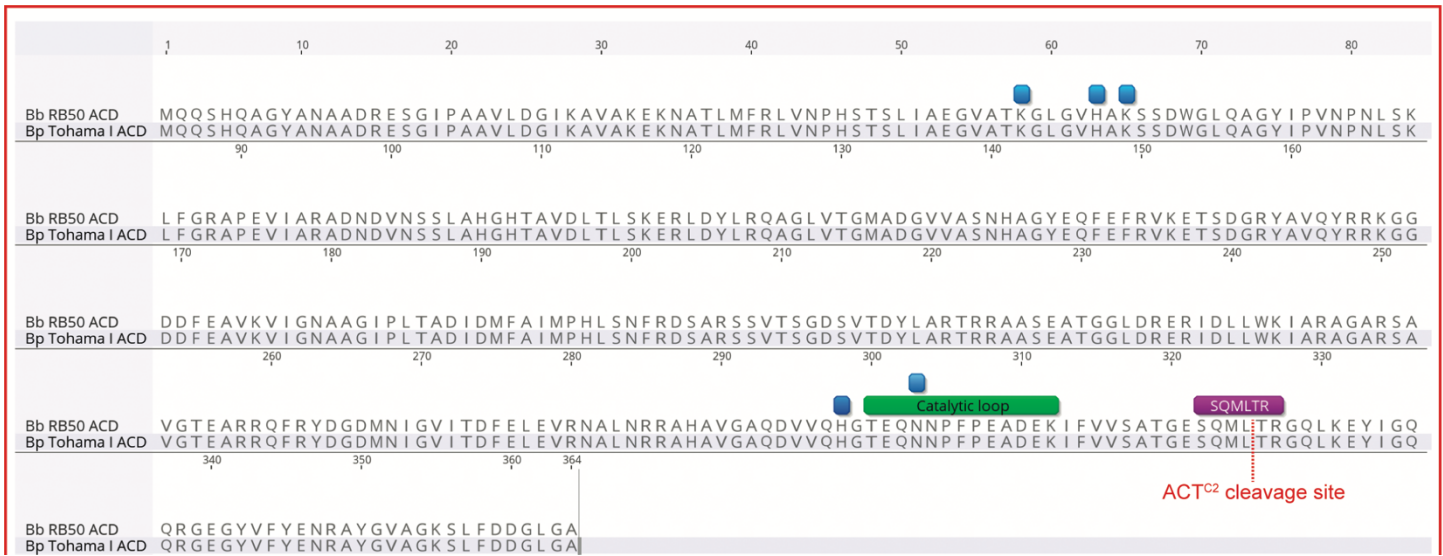

**Figure S5. The *B. bronchiseptica* RB50 ACD and the *B. pertussis* Tohama I ACD are identical at the protein level.**

Clustal Omega (supplemental ref 10) alignment between the amino acid sequences of the ACT ACDs from *B. bronchiseptica* RB50 and the *B. pertussis* Tohama I. Residues required for catalytic activity (blue), the catalytic loop (green, T300-K312), and the ACT<sup>C2</sup> cleavage site (dotted red line) are indicated.

## Supplemental Bibliography

1. Cotter PA, Miller JF. BvgAS-mediated signal transduction: analysis of phase-locked regulatory mutants of *Bordetella bronchiseptica* in a rabbit model. *Infect Immun*. 1994;62(8):3381–90.
2. Julio SM, Cotter PA. Characterization of the Filamentous Hemagglutinin-Like Protein FhaS in *Bordetella bronchiseptica*. *Infect Immun*. 2005;73(8):4960–71.
3. Melvin JA, Scheller EV, Noël CR, Cotter PA. New Insight into Filamentous Hemagglutinin Secretion Reveals a Role for Full-Length FhaB in *Bordetella* Virulence. *Mbio*. 2015;6(4):e01189-15.
4. Noël CR, Mazar J, Melvin JA, Sexton JA, Cotter PA. The prodomain of the *Bordetella* two-partner secretion pathway protein FhaB remains intracellular yet affects the conformation of the mature C-terminal domain. *Mol Microbiol*. 2012;86(4):988–1006.
5. Mason E, Henderson MW, Scheller EV, Byrd MS, Cotter PA. Phenotypic bistability in *Bordetella*. *Mol Microbiol*. 2013;90(4):716–33.
6. Henderson MW, Inatsuka CS, Sheets AJ, Williams CL, Benaron DJ, Donato GM, et al. Contribution of *Bordetella* filamentous hemagglutinin and adenylate cyclase toxin to suppression and evasion of interleukin-17-mediated inflammation. *Infect Immun*. 2012;80(6):2061–75.
7. López CM, Rholl DA, Trunck LA, Schweizer HP. Versatile Dual-Technology System for Markerless Allele Replacement in *Burkholderia pseudomallei*  $\nabla$  †. *Appl Environ Microb*. 2009;75(20):6496–503.
8. Miller VL, Mekalanos JJ. A novel suicide vector and its use in construction of insertion mutations: osmoregulation of outer membrane proteins and virulence determinants in *Vibrio cholerae* requires *toxR*. *J Bacteriol*. 1988;170(6):2575–83.
9. Inatsuka CS, Xu Q, Vujkovic-Cvijin I, Wong S, Stibitz S, Miller JF, et al. Pertactin Is Required for *Bordetella* Species To Resist Neutrophil-Mediated Clearance  $\nabla$  . *Infect Immun*. 2010;78(7):2901–9.
10. Sievers F, Wilm A, Dineen D, Gibson TJ, Karplus K, Li W, et al. Fast, scalable generation of high-quality protein multiple sequence alignments using Clustal Omega. *Mol Syst Biol*. 2011;7(1):539–539.
